# Supplementary material for: Theoretical study and structural optimization of a flexible piezoelectret-based pressure sensor
Source: Royal Society of Chemistry journal article supplement (doi:10.1039/c8ta00688a), 2018-01-01
Supplement: c8ta00688a1.pdf [file c8ta00688a1.pdf]

## Supporting Information

### Theoretical Study and Structural Optimization of a Flexible Piezoelectret-Based Pressure Sensor

Nan Wu ‡<sup>a</sup>, Shuwen Chen ‡<sup>a</sup>, Shizhe Lin<sup>a</sup>, Wenbo Li<sup>a</sup>, Zisheng Xu<sup>a</sup>, Fang Yuan<sup>a</sup>,

Liang Huang<sup>a</sup>, Bin Hu<sup>a</sup> and Jun Zhou<sup>a\*</sup>

#### Note S1

Parameters for PFA electret in calculation

Young's modulus  $4 \times 10^9$  Pa

Poisson's ratio 0

Calculated *a* and *b* for Figure 2b and Figure 2c

|                                                             | <b>a</b>                | <b>a×b</b>                                     |
|-------------------------------------------------------------|-------------------------|------------------------------------------------|
| $l^2 = 1.5 \times 1.5 \text{ m}^2$<br>$d = 200 \mu\text{m}$ | 182 [Pa <sup>-2</sup> ] | $1.267 \times 10^{22} [\mu\text{m}/\text{Pa}]$ |
| $l^2 = 2.5 \times 2.5 \text{ m}^2$<br>$d = 200 \mu\text{m}$ | 150 [Pa <sup>-2</sup> ] | $5.645 \times 10^{22} [\mu\text{m}/\text{Pa}]$ |
| $l^2 = 3.5 \times 3.5 \text{ m}^2$<br>$d = 200 \mu\text{m}$ | 102 [Pa <sup>-2</sup> ] | $3.669 \times 10^{22} [\mu\text{m}/\text{Pa}]$ |
| $l^2 = 1.5 \times 1.5 \text{ m}^2$<br>$d = 300 \mu\text{m}$ | 273 [Pa <sup>-2</sup> ] | $1.694 \times 10^{22} [\mu\text{m}/\text{Pa}]$ |
| $l^2 = 1.5 \times 1.5 \text{ m}^2$<br>$d = 400 \mu\text{m}$ | 364 [Pa <sup>-2</sup> ] | $2.153 \times 10^{22} [\mu\text{m}/\text{Pa}]$ |
|                                                             |                         |                                                |

## Supplementary Figures

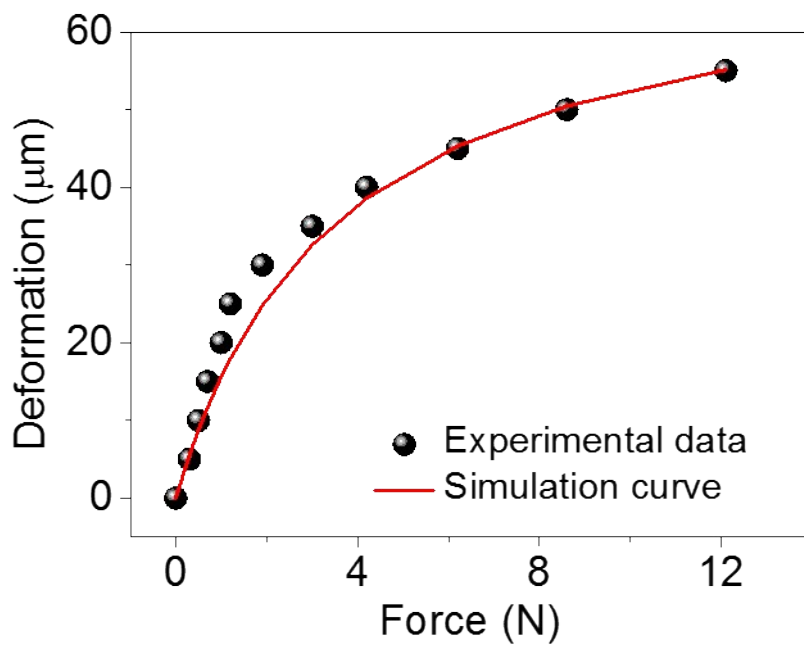

**Figure S1** Experimental data and simulation curve for a typical FPPS. Here,  $a$  (the maximum deformation) is equal to 70 and  $b$  is equal to 0.28.

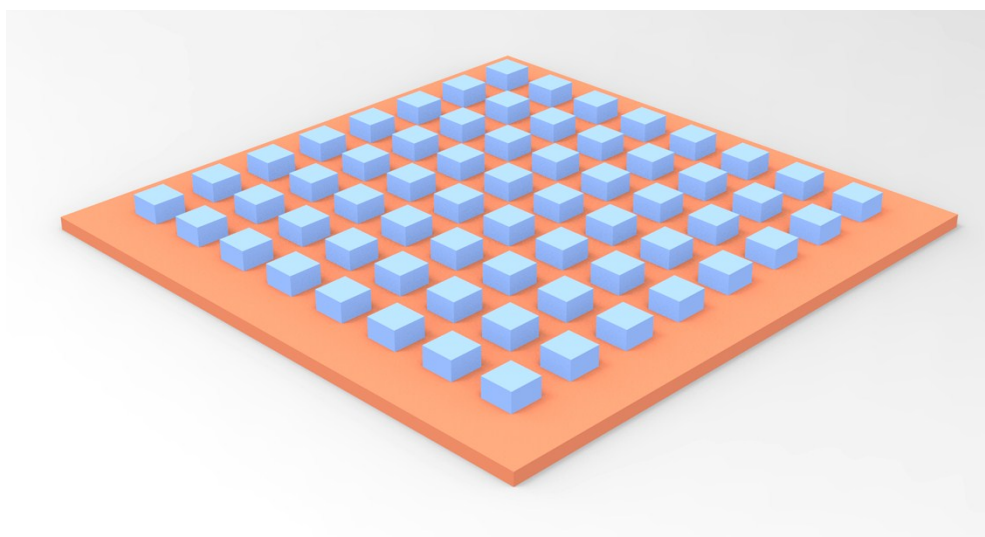

**Figure S2** Schematic diagram of a PFA electret film with 8 $\times$ 8 supporting array

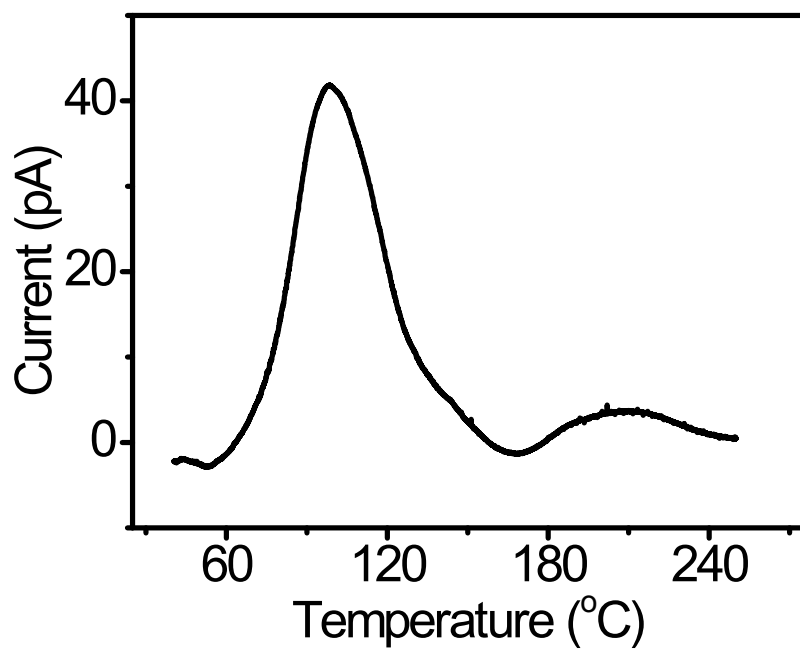

**Figure S3** Thermally stimulated discharge spectrum for a corona-charged PFA electret film.
